# Supplementary material for: Game—A Carbon Emissions Game
Source: Atypon-hosted journal article supplement (doi:10.1287/ited.2017.0171), 2017-07-13
Supplement: ited.2017.0171-sm-Appendix-B.pdf [file ited.2017.0171-sm-Appendix-B.pdf]

Team Members \_\_\_\_\_

| Year | Carbon credits |          |            | Energy Demand | Energy Generated |           | Per Unit Generation Costs |       | Total Generation Costs |       | Total Revenue (\$30 * total power generated) | Profit = Revenue – Generation Costs – Carbon Costs |            |
|------|----------------|----------|------------|---------------|------------------|-----------|---------------------------|-------|------------------------|-------|----------------------------------------------|----------------------------------------------------|------------|
|      | Price          | # bought | Total Cost |               | Coal             | Renewable | Coal                      | Rnwbl | Coal                   | Rnwbl |                                              | This round                                         | Cumulative |
| 1    |                |          |            |               |                  |           | 10                        | 20    |                        |       |                                              |                                                    |            |
| 2    |                |          |            |               |                  |           | 10                        | 20    |                        |       |                                              |                                                    |            |
| 3    |                |          |            |               |                  |           | 10                        | 20    |                        |       |                                              |                                                    |            |
| 4    |                |          |            |               |                  |           | 10                        | 20    |                        |       |                                              |                                                    |            |
| 5    |                |          |            |               |                  |           | 10                        | 20    |                        |       |                                              |                                                    |            |
| 6    |                |          |            |               |                  |           | 10                        | 20    |                        |       |                                              |                                                    |            |

Team Members \_\_\_\_\_

| Round | Carbon credits |          |            | Energy Demand | Energy Generated |           | Per Unit Generation Costs |       | Total Generation Costs |       | Total Revenue (\$30 * total power generated) | Profit = Revenue – Generation Costs – Carbon Costs |            |
|-------|----------------|----------|------------|---------------|------------------|-----------|---------------------------|-------|------------------------|-------|----------------------------------------------|----------------------------------------------------|------------|
|       | Price          | # bought | Total Cost |               | Coal             | Renewable | Coal                      | Rnwbl | Coal                   | Rnwbl |                                              | This round                                         | Cumulative |
| 1     |                |          |            |               |                  |           | 10                        | 20    |                        |       |                                              |                                                    |            |
| 2     |                |          |            |               |                  |           | 10                        | 20    |                        |       |                                              |                                                    |            |
| 3     |                |          |            |               |                  |           | 10                        | 20    |                        |       |                                              |                                                    |            |
| 4     |                |          |            |               |                  |           | 10                        | 20    |                        |       |                                              |                                                    |            |
| 5     |                |          |            |               |                  |           | 10                        | 20    |                        |       |                                              |                                                    |            |
| 6     |                |          |            |               |                  |           | 10                        | 20    |                        |       |                                              |                                                    |            |

Team Members

---

**Year-Round**      **Comments about your bid strategy – why you bid what you did, when you did**

Team Members

---

**Year-Round**      **Comments about your bid strategy – why you bid what you did, when you did**
